# Supplementary material for: The Role of a Natural Amphibian Skin-Based Peptide, Ranatensin, in Pancreatic Cancers Expressing Dopamine D2 Receptors
Source: MDPI journal article supplement (doi:10.3390/cancers14225535), 2022-11-10
Supplement: s1 [file s1]

## Supplementary materials

### The role of natural amphibian skin-based peptide, ranatensin, in pancreatic cancer expressing dopamine D2 receptors

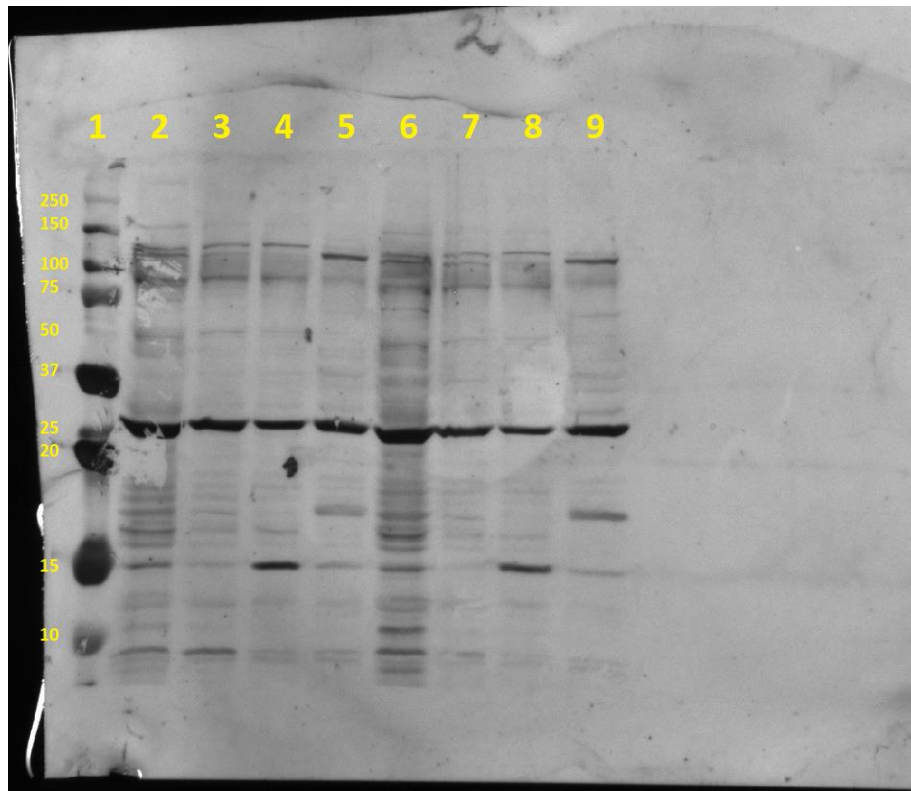

**Figure S1.** Uncropped Western blot of DRD2 protein expression in cancer and normal cells.

Line 1: Precision Plus Protein Dual Color Standard (Bio-Rad, Hercules, CA, USA); Lines 2-5 represent DRD2 expression in PANC-1 (2), BxPC-3 (3), Capan-1 (4), and NHF (5), and were also presented in Figure 3 in the main text. Lines 6-9 represent the second repetition of tested samples: PANC-1 (6), BxPC-3 (7), Capan-1 (8), and NHF (9).

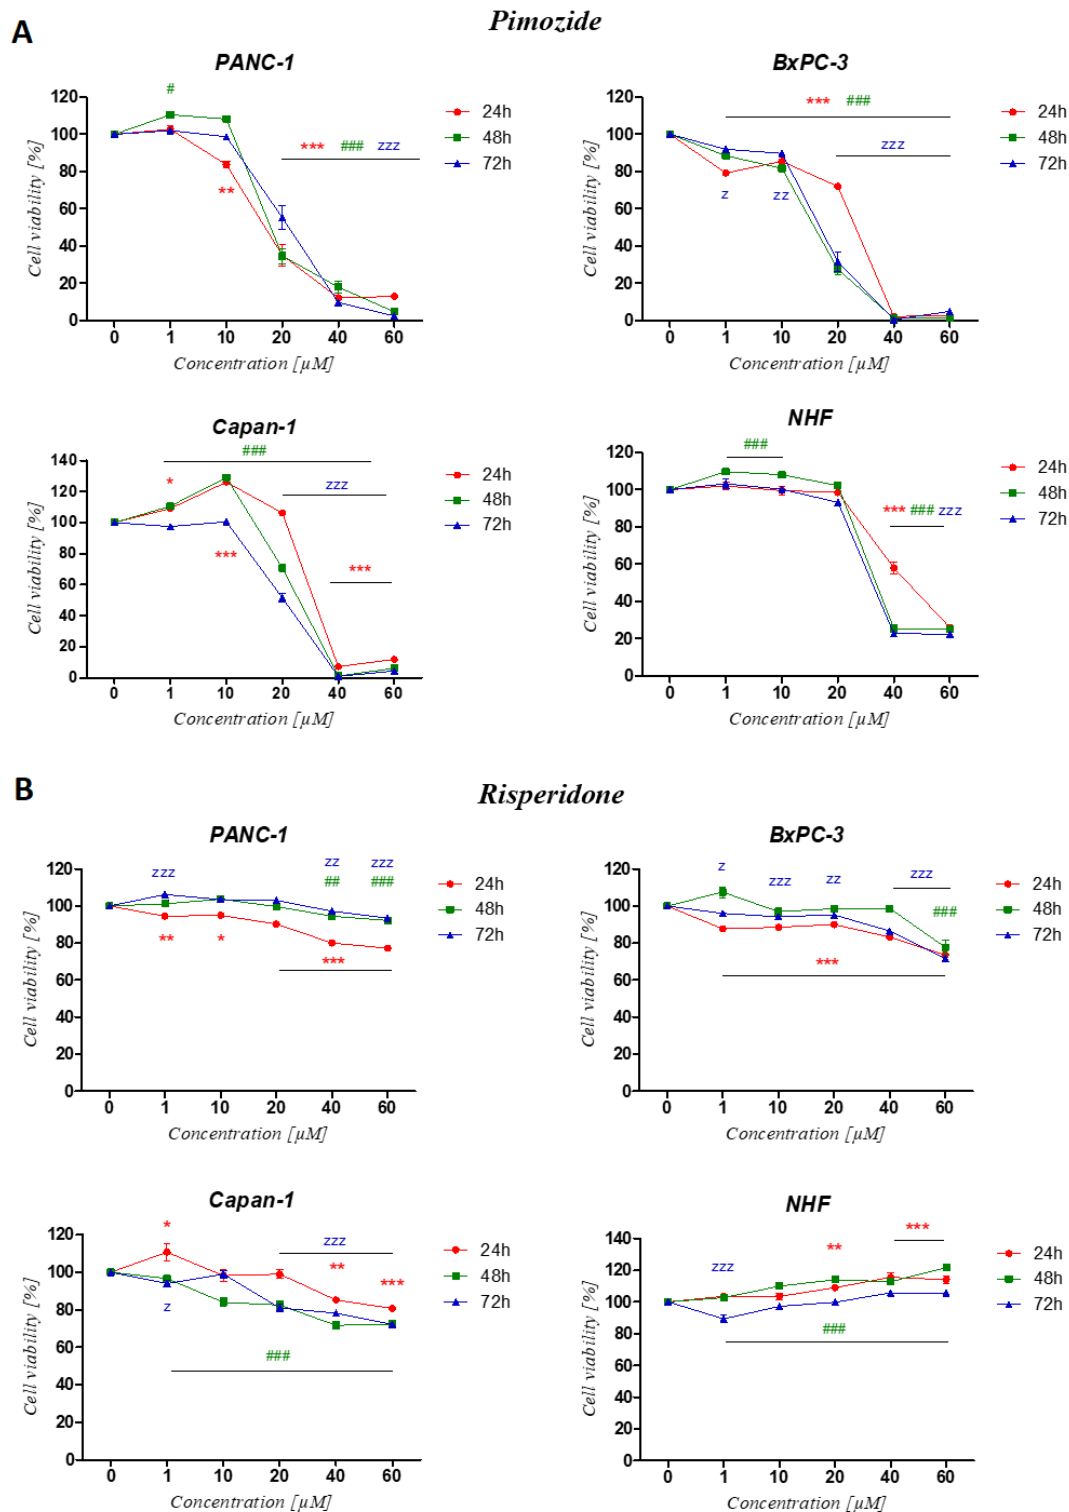

**Figure S2.** The viability of cells treated with dopamine D2 receptor antagonists, pimozide (A) and risperidone (B). The effect of each compound was evaluated in comparison to untreated cells (0  $\mu\text{M}$ ). Statistical analysis was performed using one-way ANOVA followed by Dunnett's multiple comparison test. Results were considered statistically significant when: \* $P < 0.05$ ; \*\* $P < 0.01$ ; \*\*\* $P < 0.005$ .,  $^zP < 0.05$ ;  $^{zz}P < 0.01$ ;  $^{zzz}P < 0.005$ , as well as  $^{##}P < 0.01$ ;  $^{###}P < 0.005$

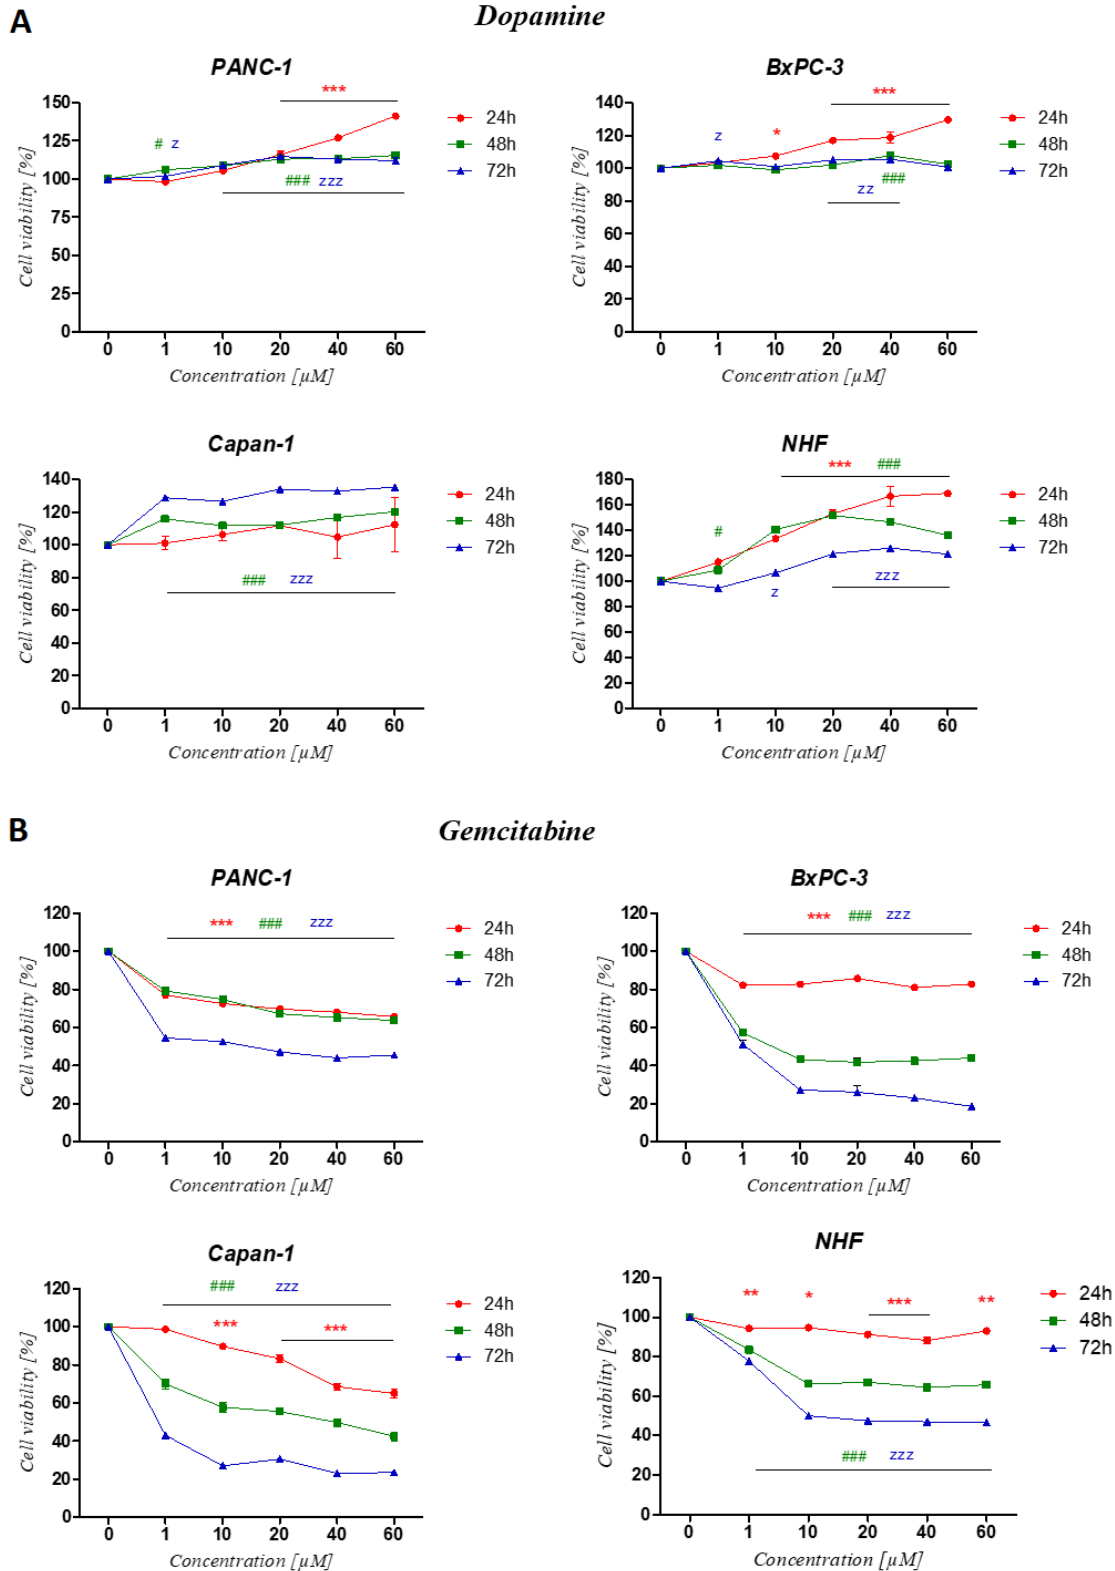

**Figure S3.** The viability of cells treated with dopamine (DRD2 agonist) (A) and gemcitabine (B). The effect of each compound was evaluated in comparison to untreated cells (0  $\mu$ M). Statistical analysis was performed using one-way ANOVA followed by Dunnett's multiple comparison test. Results were considered statistically significant when: \* $P < 0.05$ ; \*\* $P < 0.01$ ; \*\*\* $P < 0.005$ .,  $zP < 0.05$ ;  $zzzP < 0.005$ , as well as  $###P < 0.005$

## A Dopamine

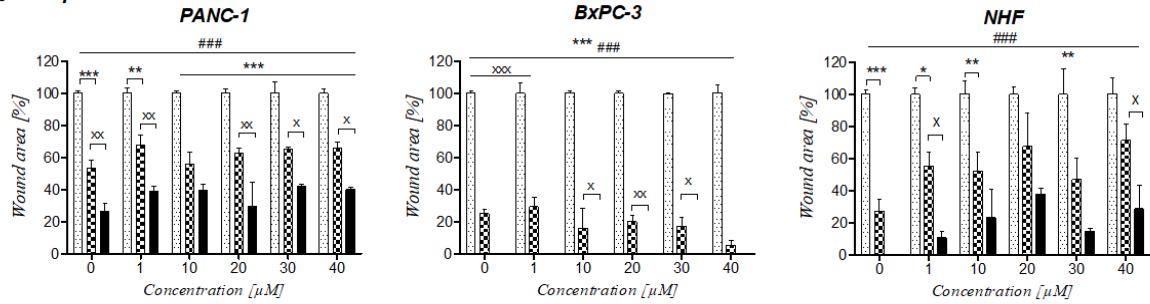

## B Risperidone

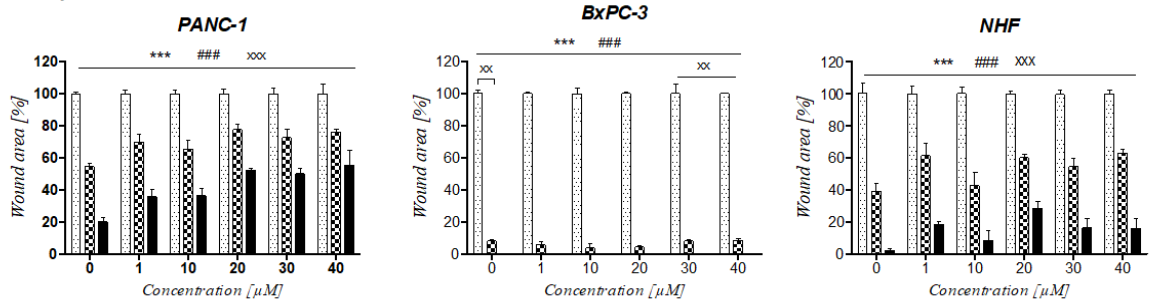

## C Pimozide

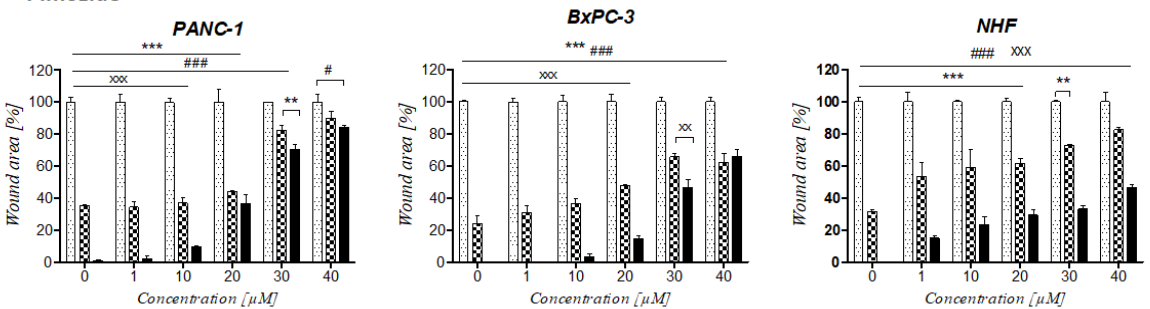

## D Gemcitabine

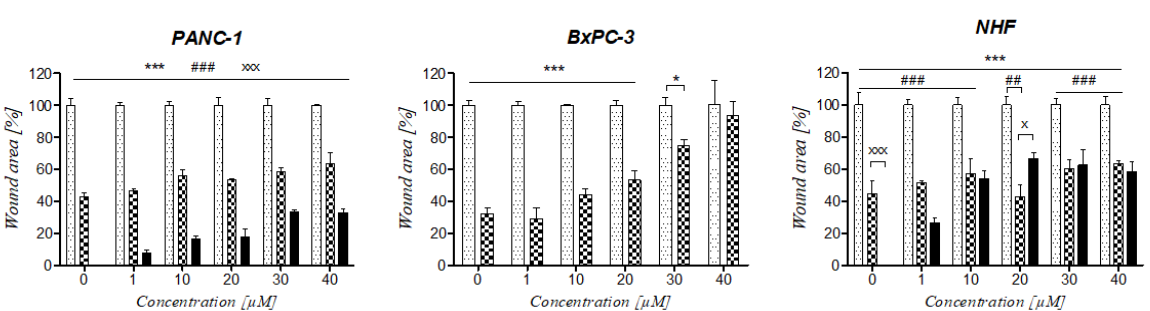

\* – 0h : 24h

# – 0h : 48h

x – 24h : 48h

□ 0h    ▨ 24h    ■ 48h

**Figure S4.** The effect of compounds on cell migration. Representative phase-contrast microscope images showing the area covered by the cells at 0, 24, and 48h after wounding, and presented in Figure S10. Original magnification 10x. Wound area (%) was determined by the rate of cells moving towards the scratched area upon time using ImageJ™ software. Differences in wound area of cells treated with increasing concentrations of RAN at different time points were analyzed. Statistical analysis performed using two-way ANOVA followed by Bonferroni post-tests. Results were considered statistically

significant when: \*P < 0.05; \*\* P < 0.01; \*\*\*P < 0.005 for 0 h vs 24 h, #P < 0.05; ##P < 0.01; ###P < 0.005 for 0 h vs 48 h, xP < 0.05; xxP < 0.01; xxxP < 0.005 for 24 h vs 48 h.

#### **PANC-1**

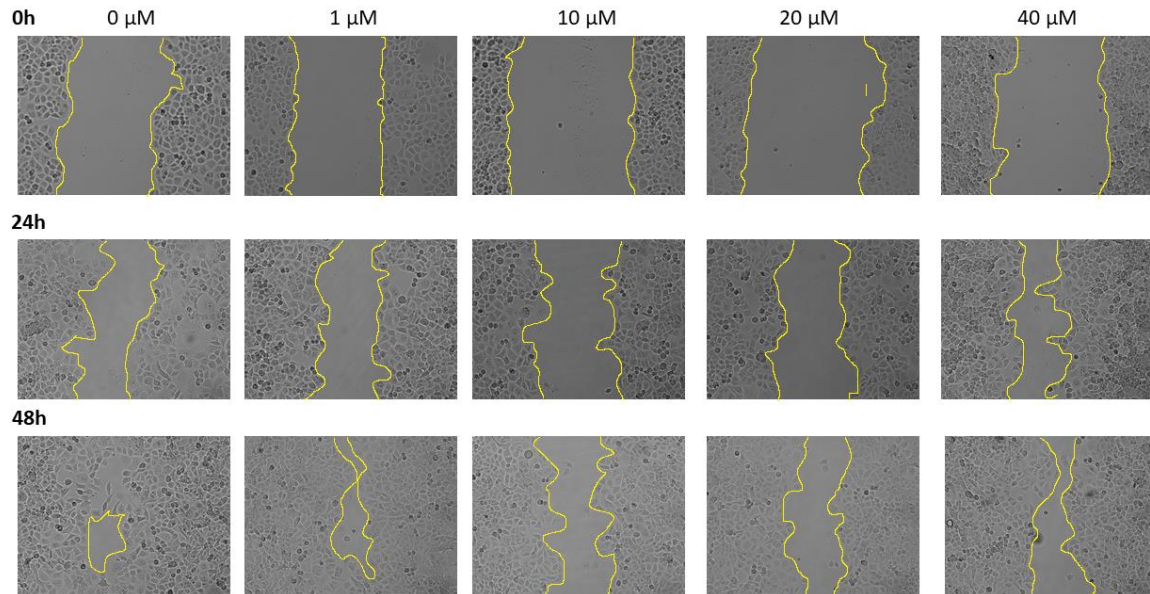

**Figure S5.** The effect of RAN on the migration of PANC-1 cells. Wound-healing assays were performed at 0, 24, and 48h on RAN-treated and untreated PANC-1 cells. Representative phase-contrast microscope images showing the area covered by the cells at 0, 24, and 48h after wounding. Original magnification 10x. Wound area (%) was determined by the rate of cells moving towards the scratched area upon time using ImageJ™ software, and presented in Figure 5.

#### **BxPC-3**

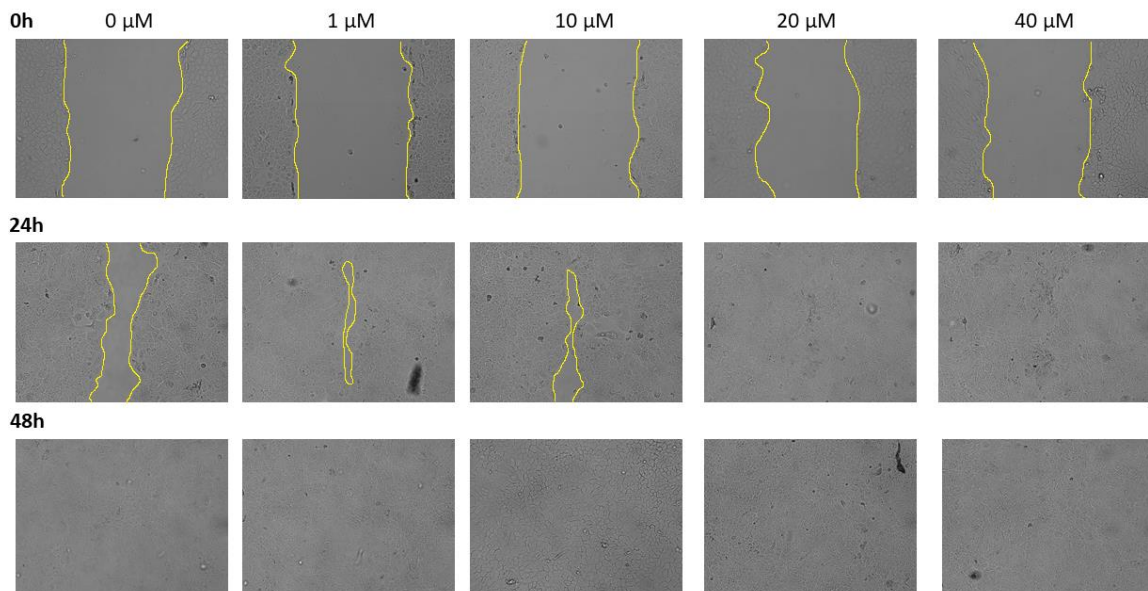

**Figure S6.** The effect of RAN on the migration of BxPC-3 cells. Wound-healing assays were performed at 0, 24, and 48h on RAN-treated and untreated BxPC-3 cells. Representative phase-contrast microscope images showing the area covered by the cells at 0, 24, and 48h after wounding. Original magnification

10x. Wound area (%) was determined by the rate of cells moving towards the scratched area upon time using ImageJ™ software, and presented in Figure 5.

**NHF**

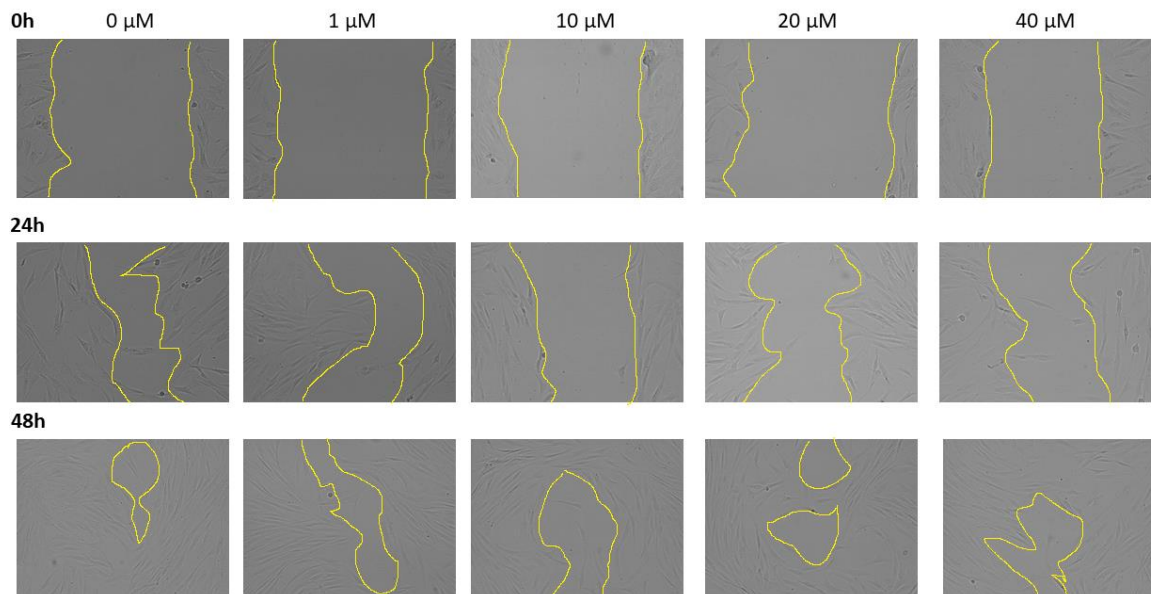

**Figure S7.** The effect of RAN on the migration of normal fibroblasts. Wound-healing assays were performed at 0, 24, and 48h on RAN-treated and untreated fibroblasts. Representative phase-contrast microscope images showing the area covered by the cells at 0, 24, and 48h after wounding. Original magnification 10x. Wound area (%) was determined by the rate of cells moving towards the scratched area upon time using ImageJ™ software, and presented in Figure 5.



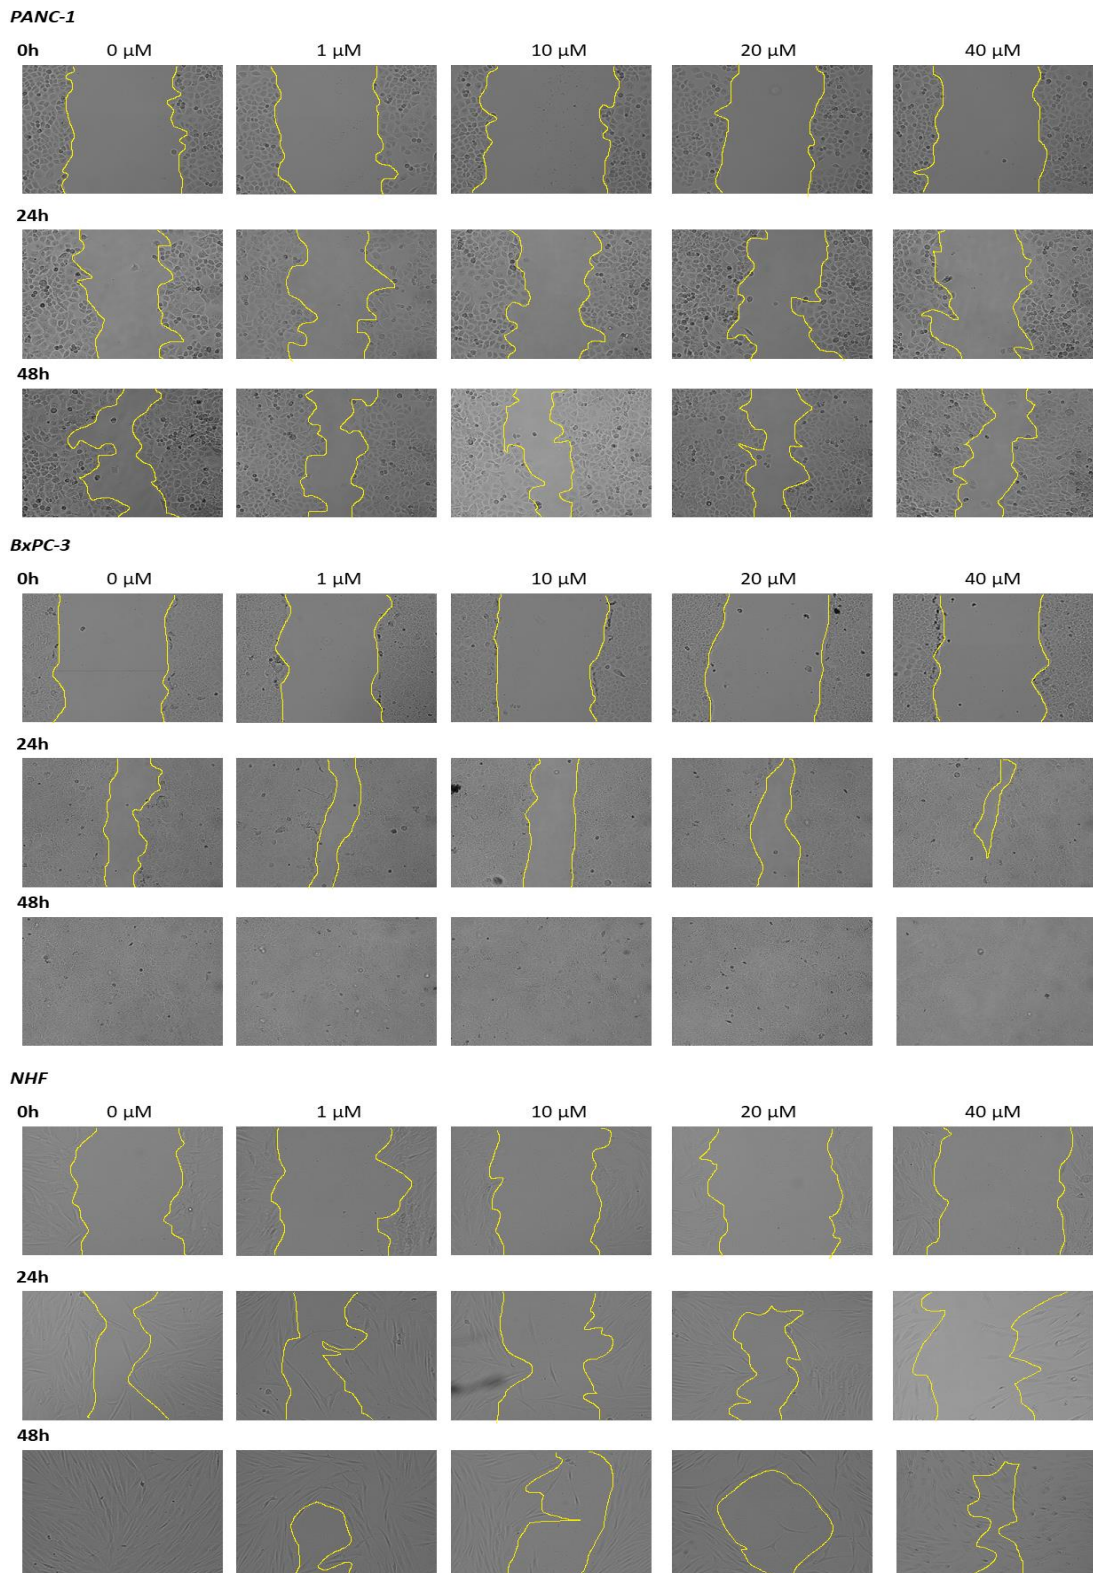

**Figure S8.** The effect of dopamine on the migration of cancer cells and normal fibroblasts. Wound-healing assays were performed at 0, 24, and 48h on dopamine-treated and untreated cells. Representative phase-contrast microscope images showing the area covered by the cells at 0, 24, and 48h after wounding. Original magnification 10x. Wound area (%) was determined by the rate of cells moving towards the scratched area upon time using ImageJ<sup>TM</sup> software, and presented in Figure S4A.

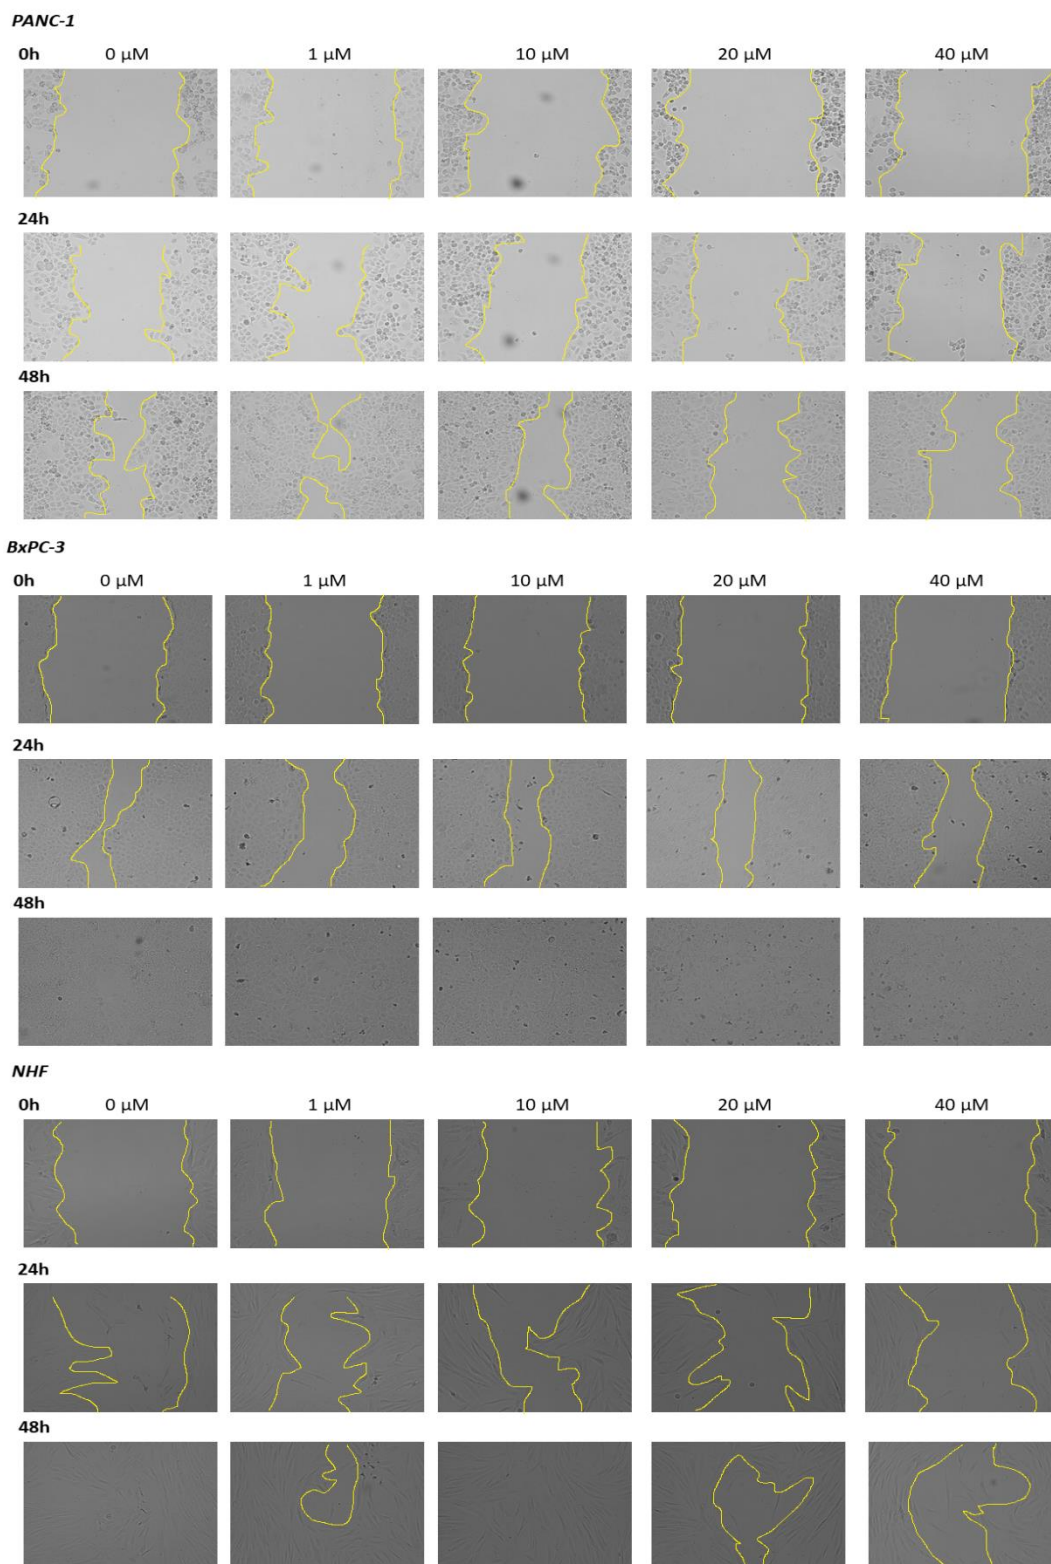

**Figure S9.** The effect of risperidone on the migration of cancer cells and normal fibroblasts. Wound-healing assays were performed at 0, 24, and 48h on risperidone-treated and untreated cells. Representative phase-contrast microscope images showing the area covered by the cells at 0, 24, and 48h after wounding. Original magnification 10x. Wound area (%) was determined by the rate of cells moving towards the scratched area upon time using ImageJ<sup>TM</sup> software, and presented in Figure S4B.



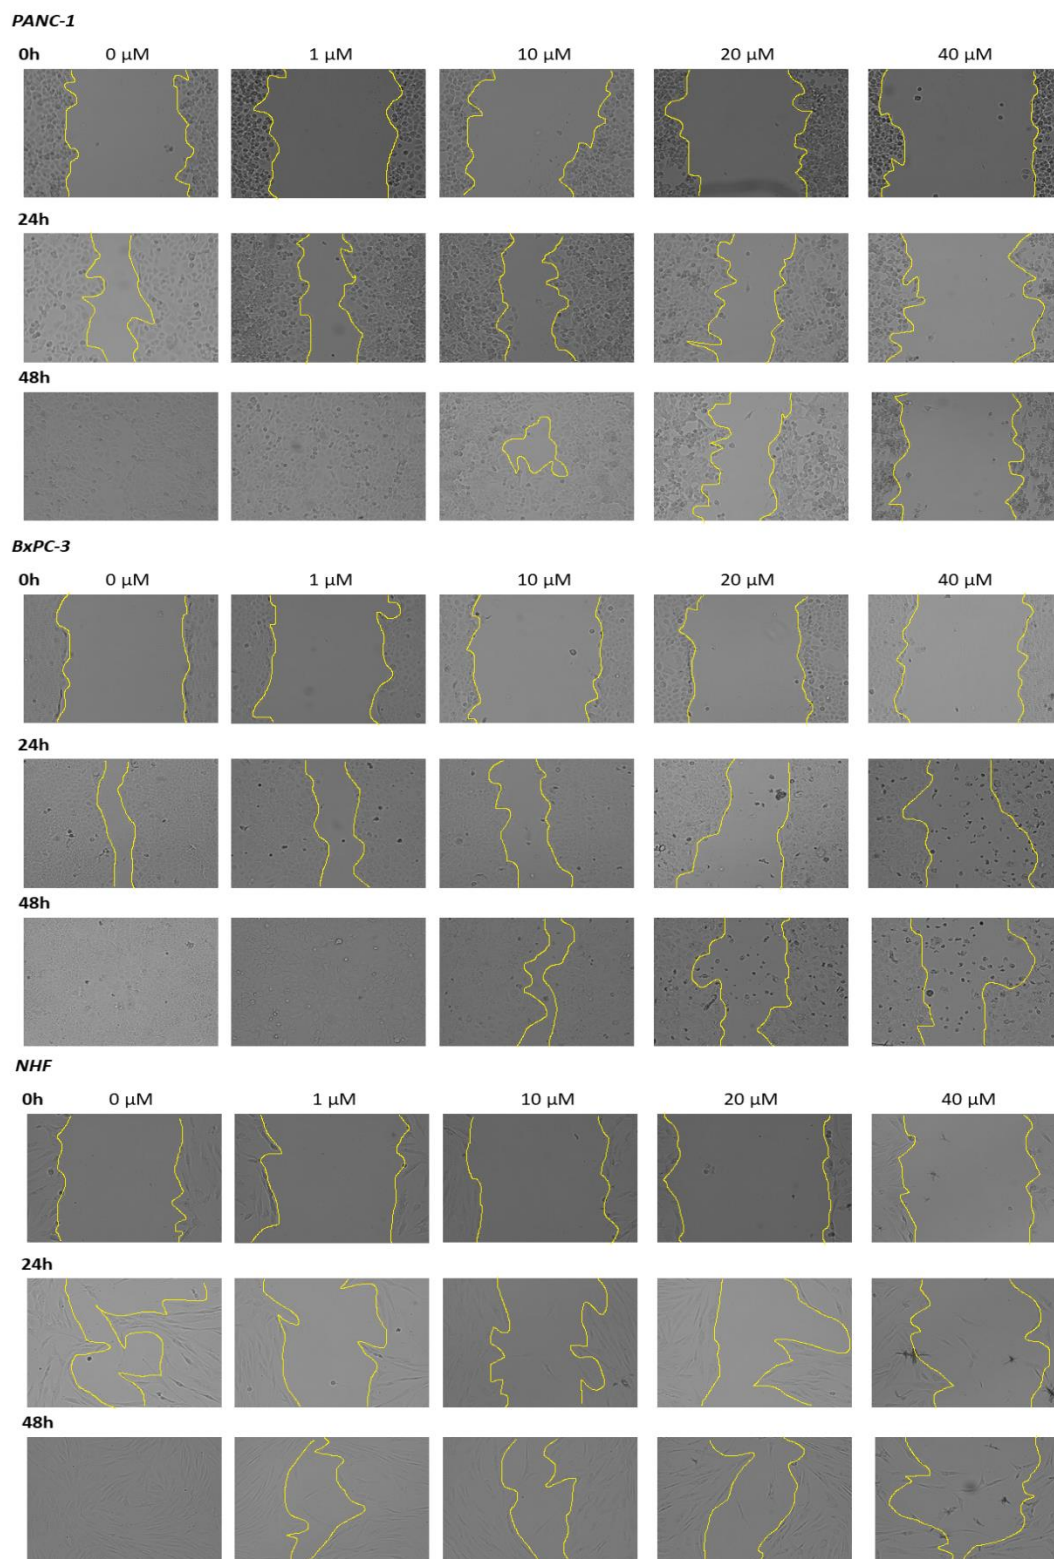

**Figure S10.** The effect of pimozide on the migration of cancer cells and normal fibroblasts. Wound-healing assays were performed at 0, 24, and 48h on pimozide-treated and untreated cells. Representative phase-contrast microscope images showing the area covered by the cells at 0, 24, and 48h after wounding. Original magnification 10x. Wound area (%) was determined by the rate of cells moving towards the scratched area upon time using ImageJ<sup>TM</sup> software, and presented in Figure S4C.

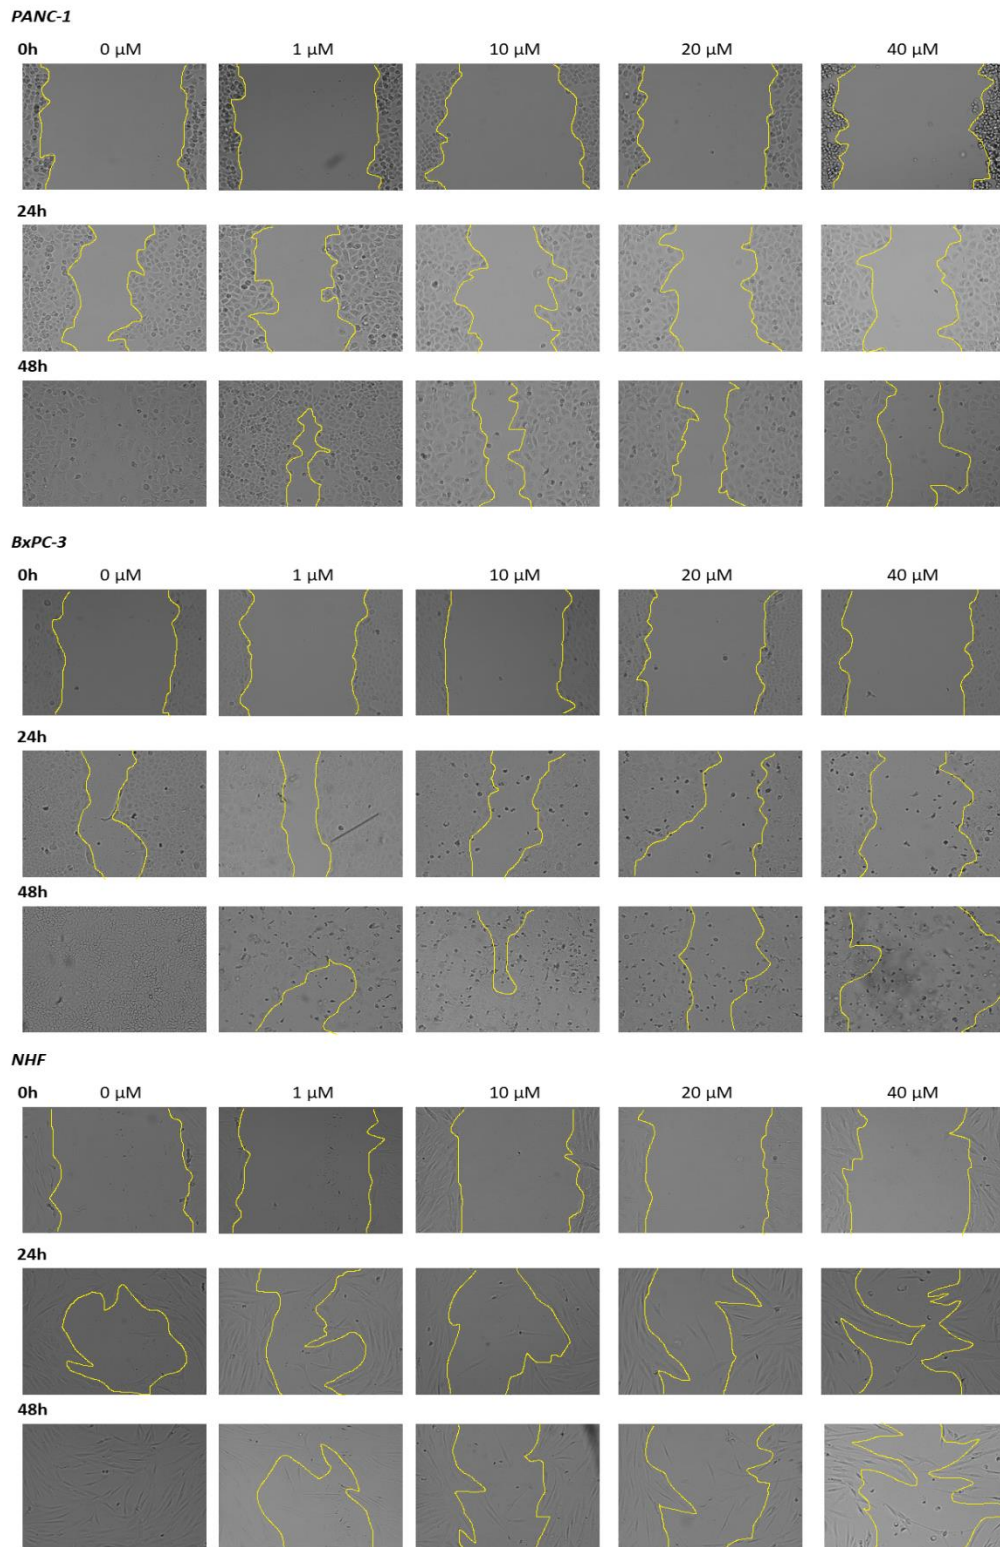

**Figure S11.** The effect of gemcitabine on the migration of cancer cells and normal fibroblasts. Wound-healing assays were performed at 0, 24, and 48h on gemcitabine-treated and untreated cells. Representative phase-contrast microscope images showing the area covered by the cells at 0, 24, and 48h after wounding. Original magnification 10x. Wound area (%) was determined by the rate of cells moving towards the scratched area upon time using ImageJ<sup>TM</sup> software, and presented in Figure S4D.

### A Ranatensin

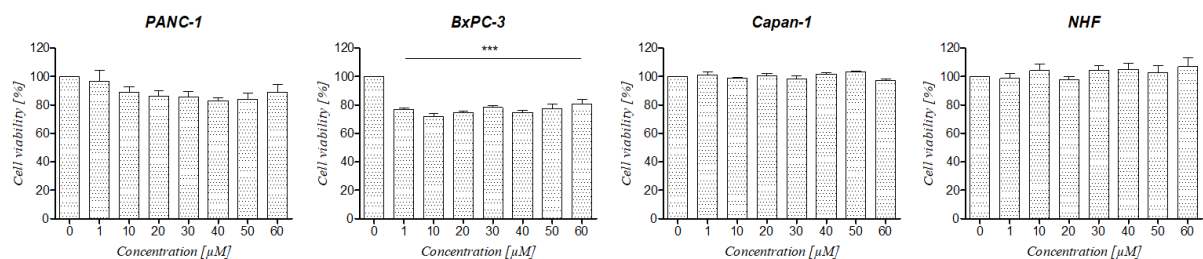

### B Dopamine

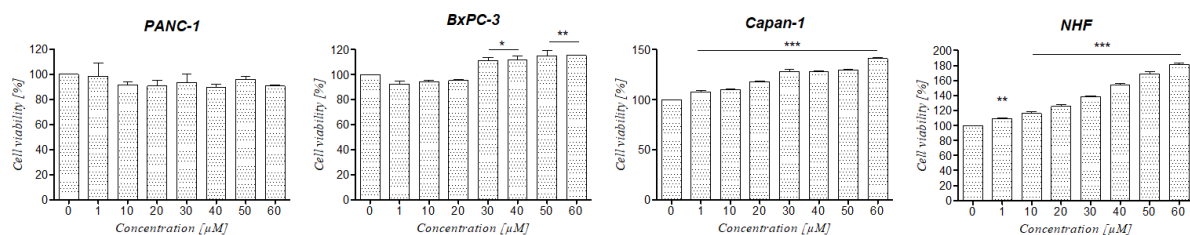

### C Pimozide

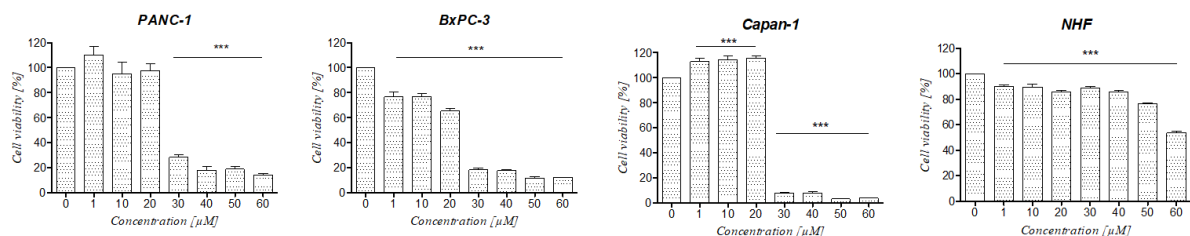

**Figure S12.** The effect of DRD2 agonists (A, B) and antagonist (C) on the viability of risperidone-pretreated cells after 24 h incubation. Statistical analysis was performed using one way ANOVA followed by Dunnett's multiple comparison test. Results were considered statistically significant when: \* $P < 0.05$ ; \*\* $P < 0.01$ ; \*\*\* $P < 0.005$ .

**A****Dopamine**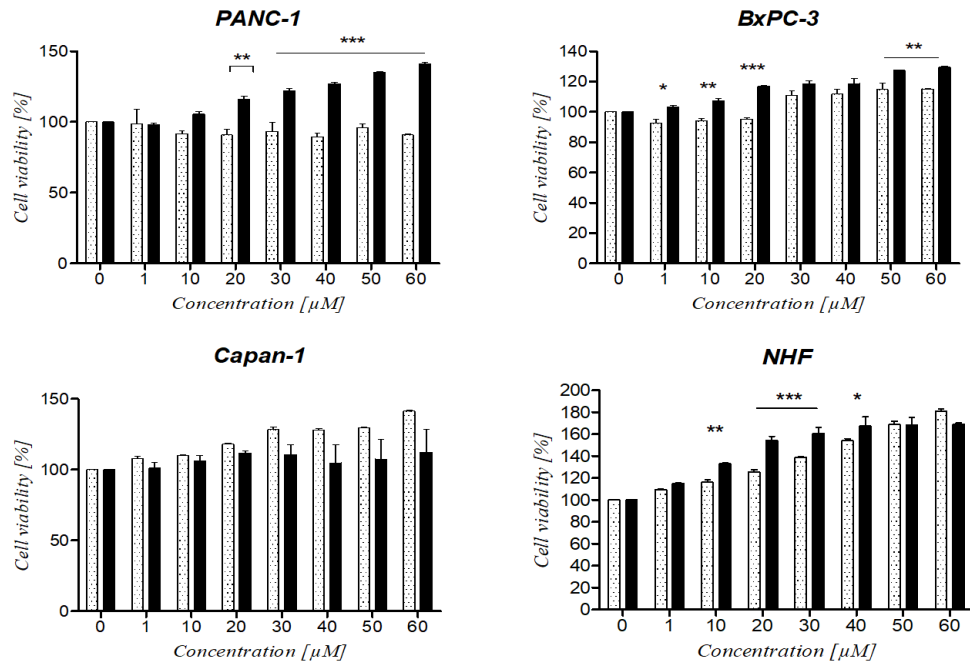**B****Pimozide**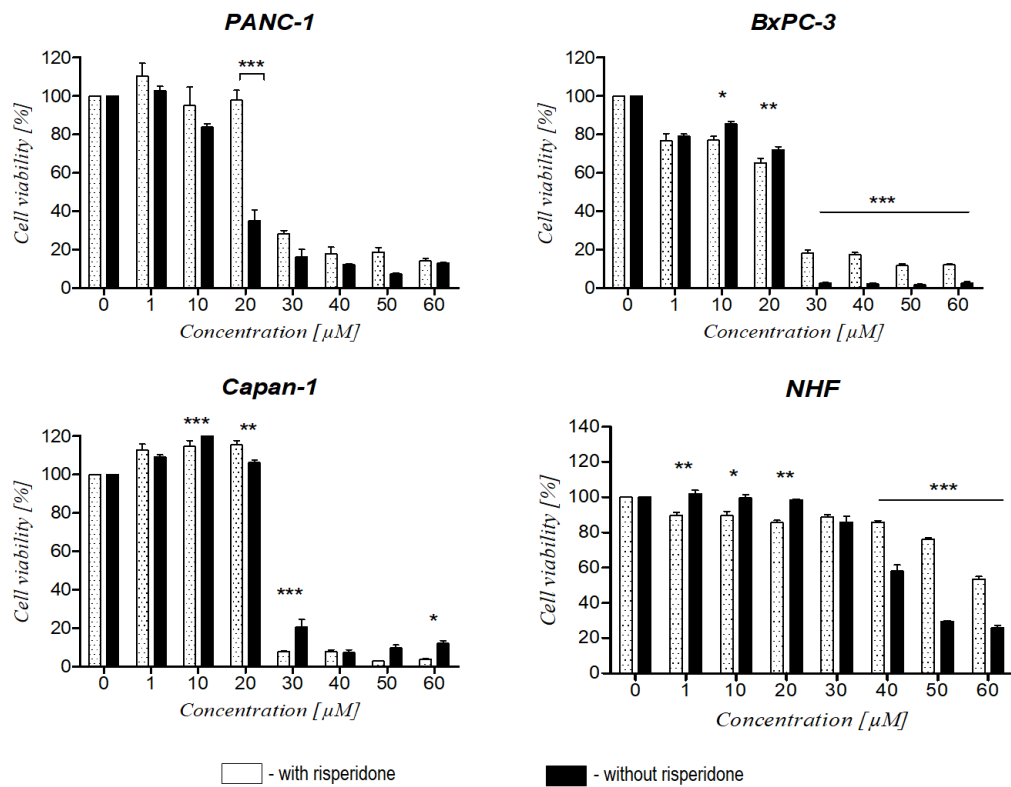

**Figure S13.** The comparison between the viability of risperidone-pretreated cells exposed to dopamine (A) or pimozide (B) and cells treated with dopamine or pimozide alone for 24h. Statistical analysis was performed using two-way ANOVA followed by Bonferroni post-tests. Results were considered statistically significant when: \* $P < 0.05$ ; \*\* $P < 0.01$ ; \*\*\* $P < 0.005$



### A Ranatensin

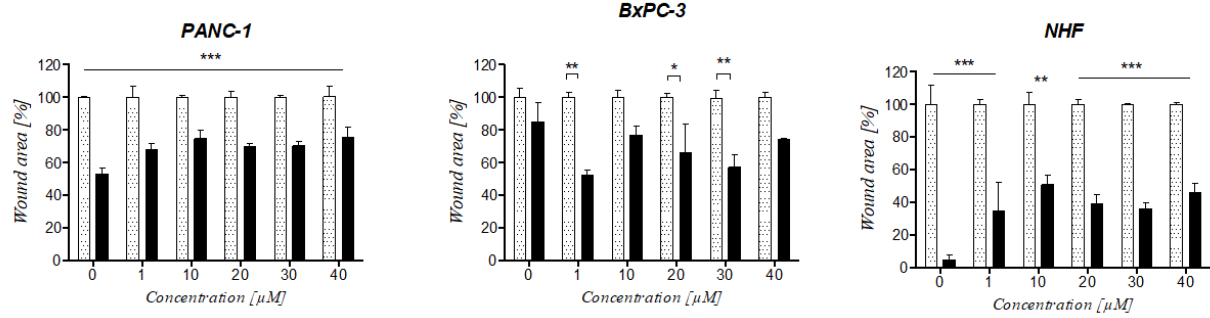

### B Dopamine

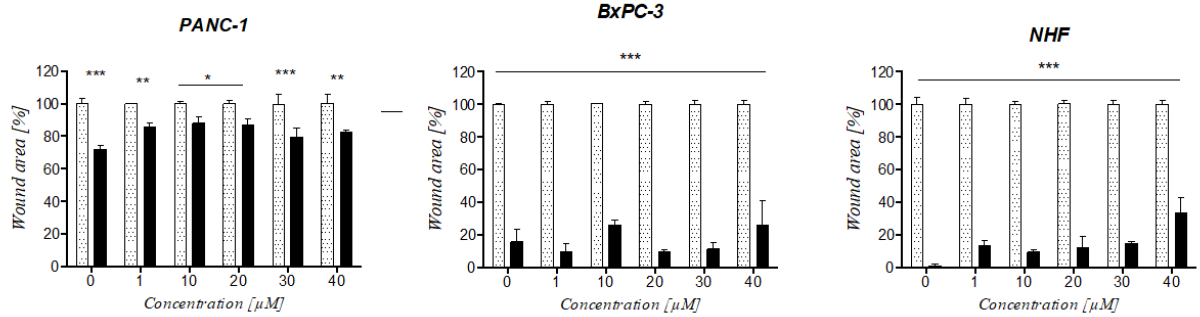

### C Pimozide

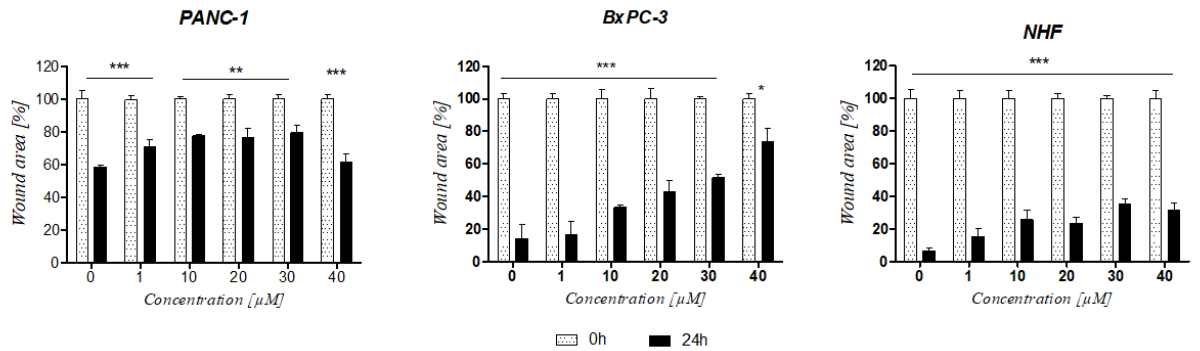

**Figure S14.** The effect of compounds on the cell migration of risperidone-pretreated cells. Representative phase-contrast microscope images showing the area covered by the cells at 0 and 24h after wounding, and presented in Figure S10. Original magnification 10x. Wound area (%) was determined by the rate of cells moving towards the scratched area upon time using ImageJ™ software. Differences in wound area of cells treated with increasing concentrations of RAN at 0 and 24h were analyzed. Statistical analysis was performed using two-way ANOVA followed by Bonferroni post-tests. Results were considered statistically significant when: \* $P < 0.05$ ; \*\* $P < 0.01$ ; \*\*\* $P < 0.005$ .

## Dopamine

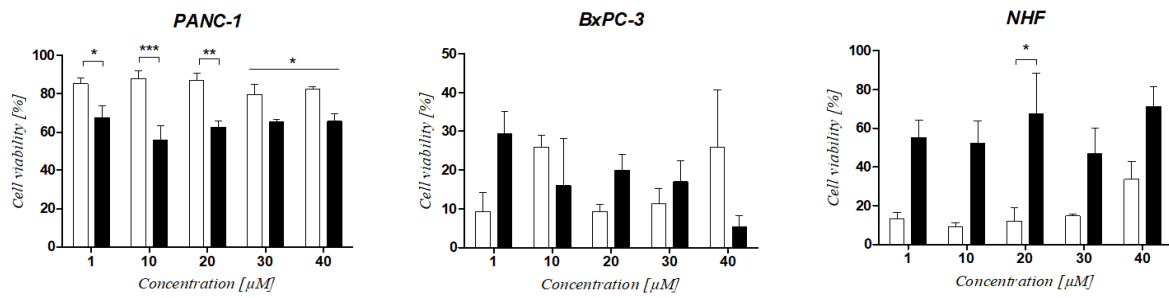

## Pimozide

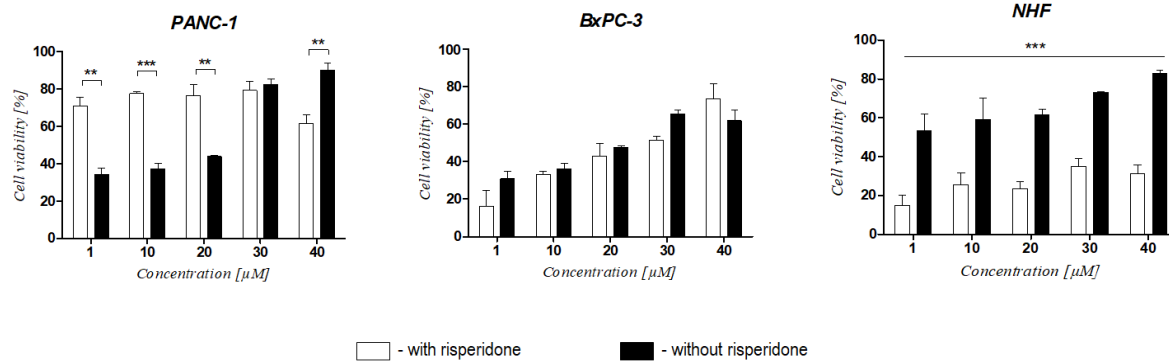

**Figure S15.** Comparison of the effect of dopamine and pimozide on the migration of risperidone-pretreated cells and cells treated with dopamine and pimozide alone after 24 h. Statistical analysis was performed using two-way ANOVA followed by Bonferroni post-tests. Results were considered statistically significant when: \* $P < 0.05$ ; \*\* $P < 0.01$ ; \*\*\* $P < 0.005$

**A PANC-1**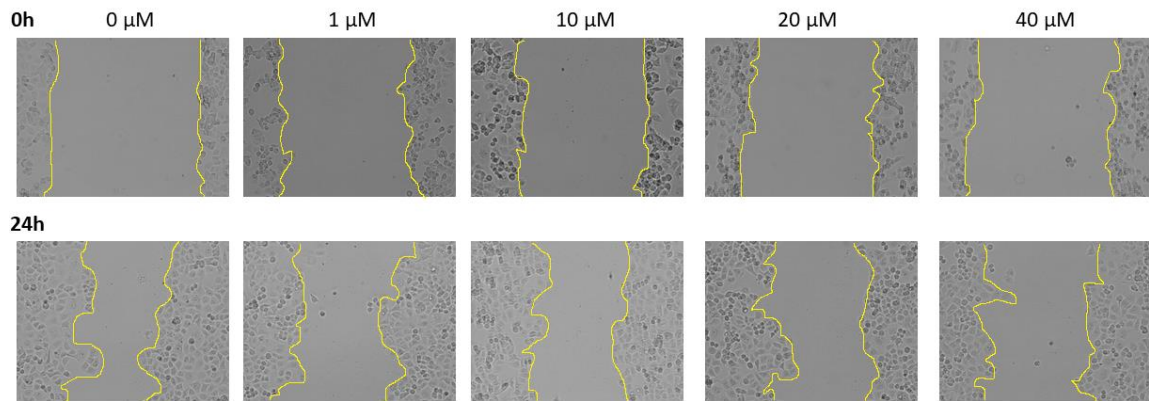**B BxPC-3**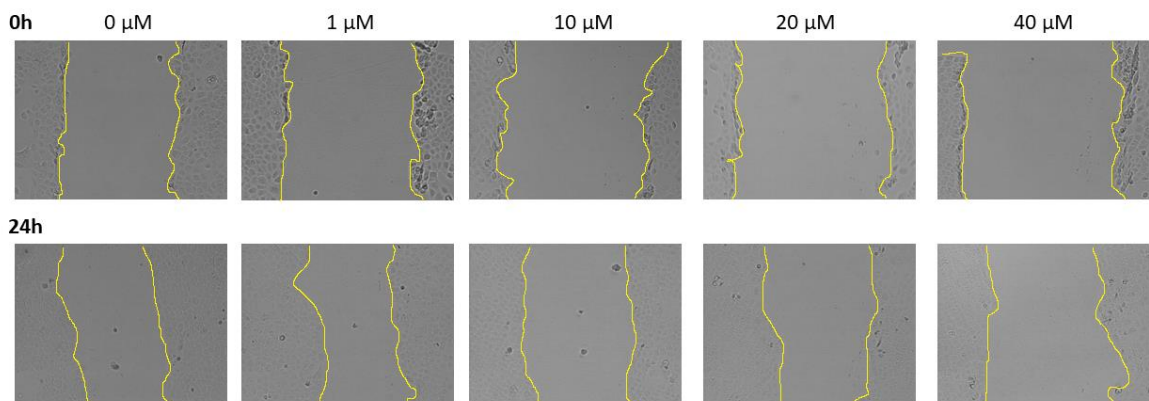**C NHF**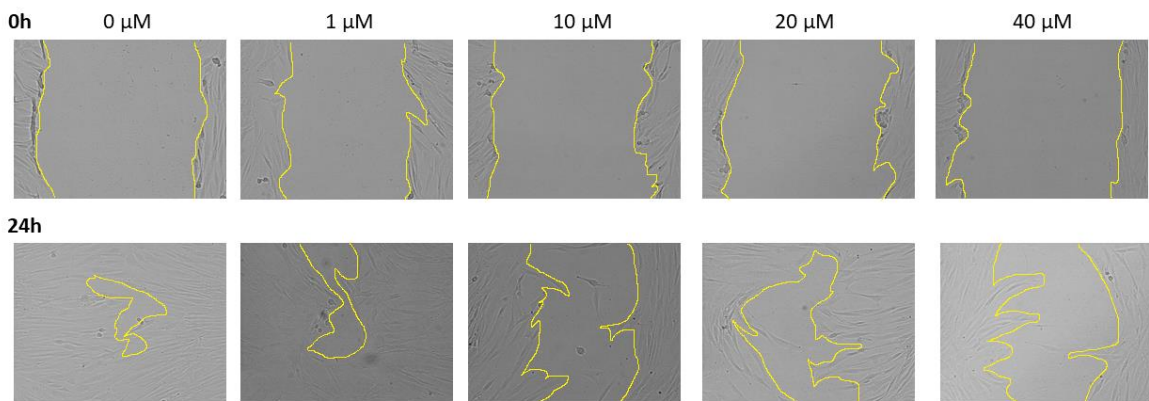

**Figure S16.** The effect of ranatensin on the cell migration of risperidone-pretreated cells. Wound-healing assays were performed at 0 and 24 on RAN treated and untreated PANC-1 (A), BxPC3 (B), and NHF (C) cells. Representative phase-contrast microscope images showing the area covered by the cells at 0 and 24h after wounding. Original magnification 10x. Wound area (%) was determined by the rate of cells moving towards the scratched area upon time using ImageJ<sup>TM</sup> software, and presented in Figure S10.

**A PANC-1**

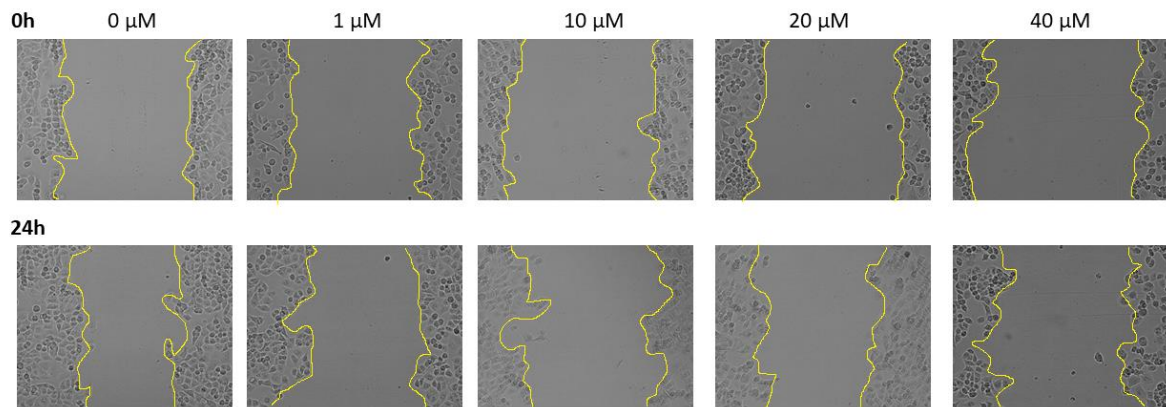

**B BxPC-3**

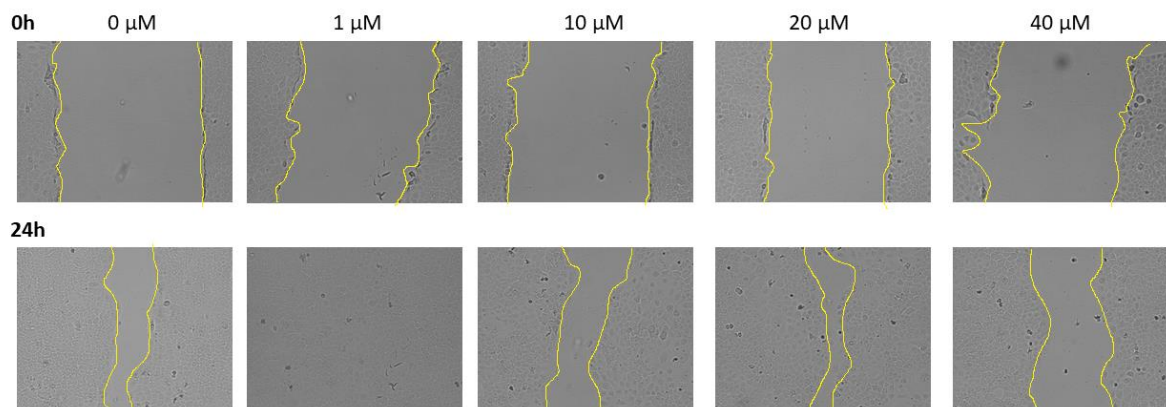

**C NHF**

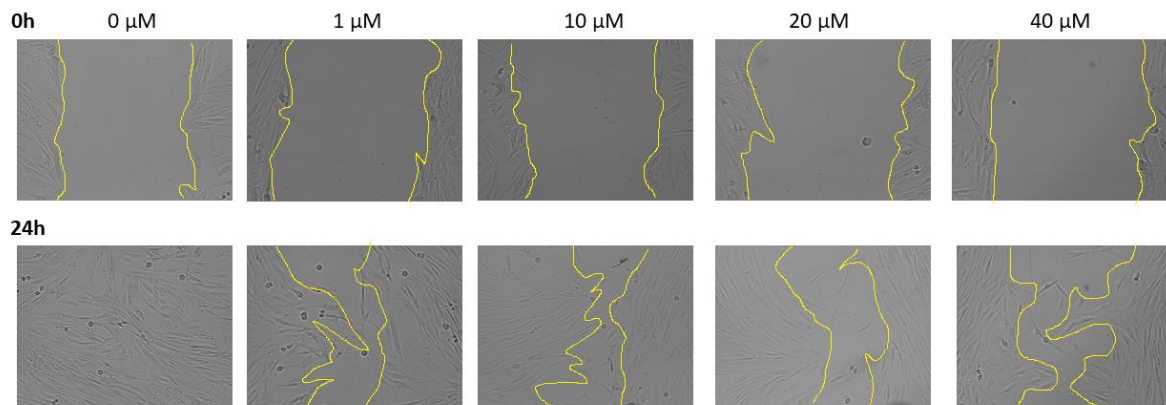

**Figure S17.** The effect of dopamine on the cell migration of risperidone-pretreated cells. Wound-healing assays were performed at 0 and 24 on dopamine-treated and untreated PANC-1 (A), BxPC3 (B), and NHF (C) cells. Representative phase-contrast microscope images showing the area covered by the cells at 0 and 24h after wounding. Original magnification 10x. Wound area (%) was determined by the rate of cells moving towards the scratched area upon time using ImageJ<sup>TM</sup> software, and presented in Figure S10.



**A PANC-1**

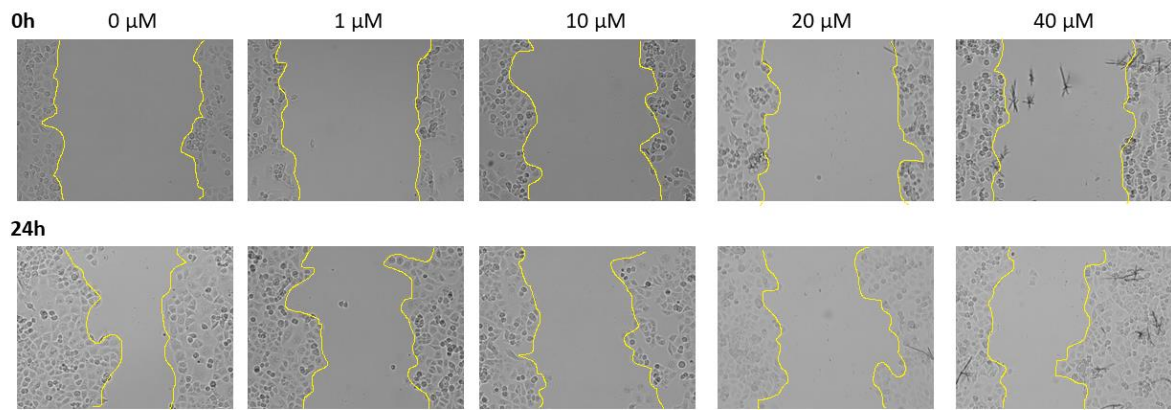

**B BxPC-3**

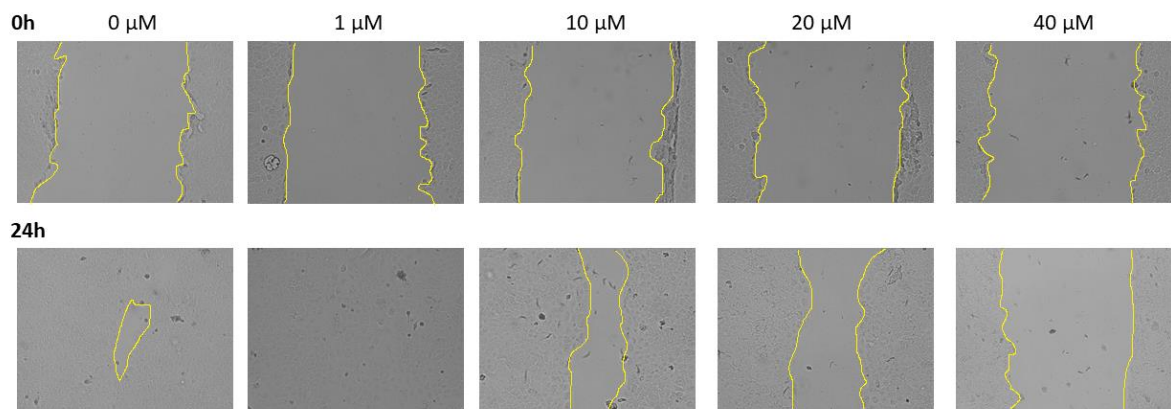

**C NHF**

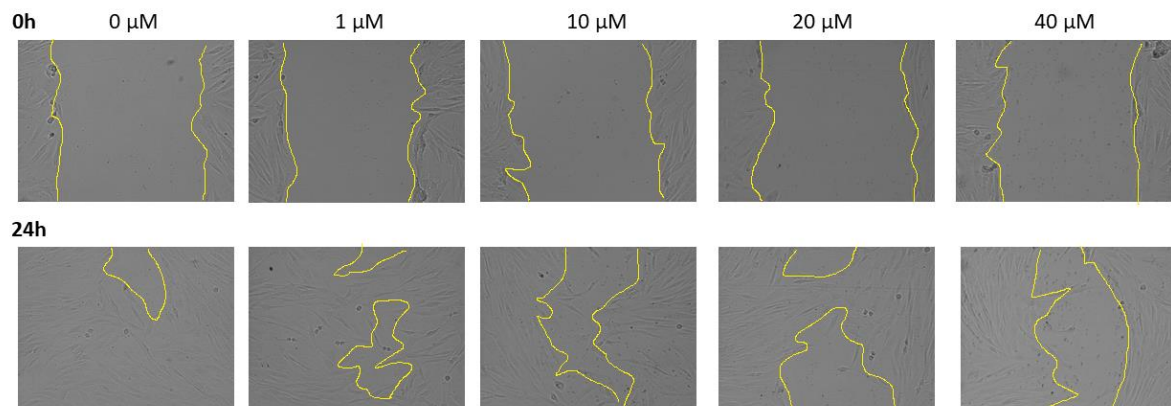

**Figure S18.** The effect of pimozide on the cell migration of risperidone-pretreated cells. Wound-healing assays were performed at 0 and 24 on pimozide-treated and untreated PANC-1 (A), BxPC3 (B), and NHF (C) cells. Representative phase-contrast microscope images showing the area covered by the cells at 0 and 24h after wounding. Original magnification 10x. Wound area (%) was determined by the rate of cells moving towards the scratched area upon time using ImageJ<sup>TM</sup> software, and presented in Figure S10.

**Table S1.** IC<sub>50</sub> values (μM) of compounds after 48 h of treatment.

| Cell line | IC <sub>50</sub> (μM) |          |              |             |               |
|-----------|-----------------------|----------|--------------|-------------|---------------|
|           | Ranatensin            | Dopamine | Pimozide     | Risperidone | Gemcitabine   |
| PANC-1    | >60                   | >60      | 16.97 ± 1.08 | >60         | >60           |
| BxPC-3    | >60                   | >60      | 16.05 ± 0.94 | >60         | 0.6426 ± 0.05 |
| Capan-1   | >60                   | >60      | 20.71 ± 1.3  | >60         | >60           |
| NHF       | >60                   | >60      | 28.71 ± 3.82 | >60         | >60           |

**Table S2.** IC<sub>50</sub> values of DRD2 -blocked cells treated with pimozide for 24 h (μM)

| Cell line       | IC <sub>50</sub> (μM) |              |              |     |
|-----------------|-----------------------|--------------|--------------|-----|
|                 | PANC-1                | BxPC-3       | Capan-1      | NHF |
| <i>Pimozide</i> | 25.70 ± 1.65          | 22.41 ± 2.02 | 27.85 ± 2.81 | >60 |
|                 |                       |              |              |     |
